# Supplementary material for: miR-126 promotes M1 to M2 macrophage phenotype switching via VEGFA and KLF4
Source: PeerJ journal article supplement (doi:10.7717/peerj.15180), 2023-03-31
Supplement: Figure5uncropped_blots.zip [file Figure5uncropped_blots.zip]

**KLF4**

**β-actin**

6 5 4 3 2 1 1 2 3 4 5 6

6 5 4 3 2 1 1 2 3 4 5 6

contrast-1

contrast-8

**VEGFA**

**β-actin**

1 2 3 4 5 6 1 2 3 4 5 6

1 2 3 4 5 6 1 2 3 4 5 6

**group:**

- 1=control,
- 2=control+mimic,
- 3=control+mimic-NC,
- 4=ox-LDL, 5=ox-LDL+mimic,
- 6=ox-LDL+mimic-NC

Original file of this **β-actin** was provided with this PDF file. Other documents have shown the situation of uncutting PVDF film.
